# Supplementary material for: De novo DNA methylation controls neuronal maturation during adult hippocampal neurogenesis
Source: PubMed Central journal article supplement (PMC8441477; doi:10.15252/embj.2020107100), 2021-08-02
Supplement: EMBJ-40-e107100-s004.pdf [file EMBJ-40-e107100-s004.pdf]

## **Appendix**

### **Table of content:**

Appendix Figures S1-3

Appendix Tables S1-5

## Appendix Figures

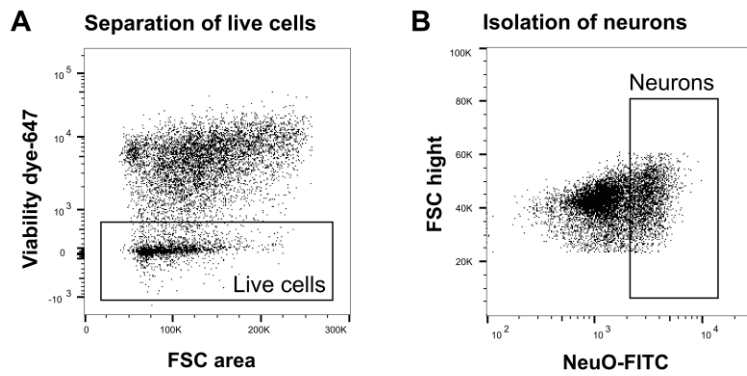

### Appendix Figure S1: Isolation of *in vitro* differentiated neurons.

**A**, After separation of single cells based on their forward scatter (FSC) and side scatter (SSC) properties, dead cells were removed using a viability dye.

**B**, Neurons were identified by fluorescence intensity of the neuronal dye NeuroFluor (NeuO) in live cells.

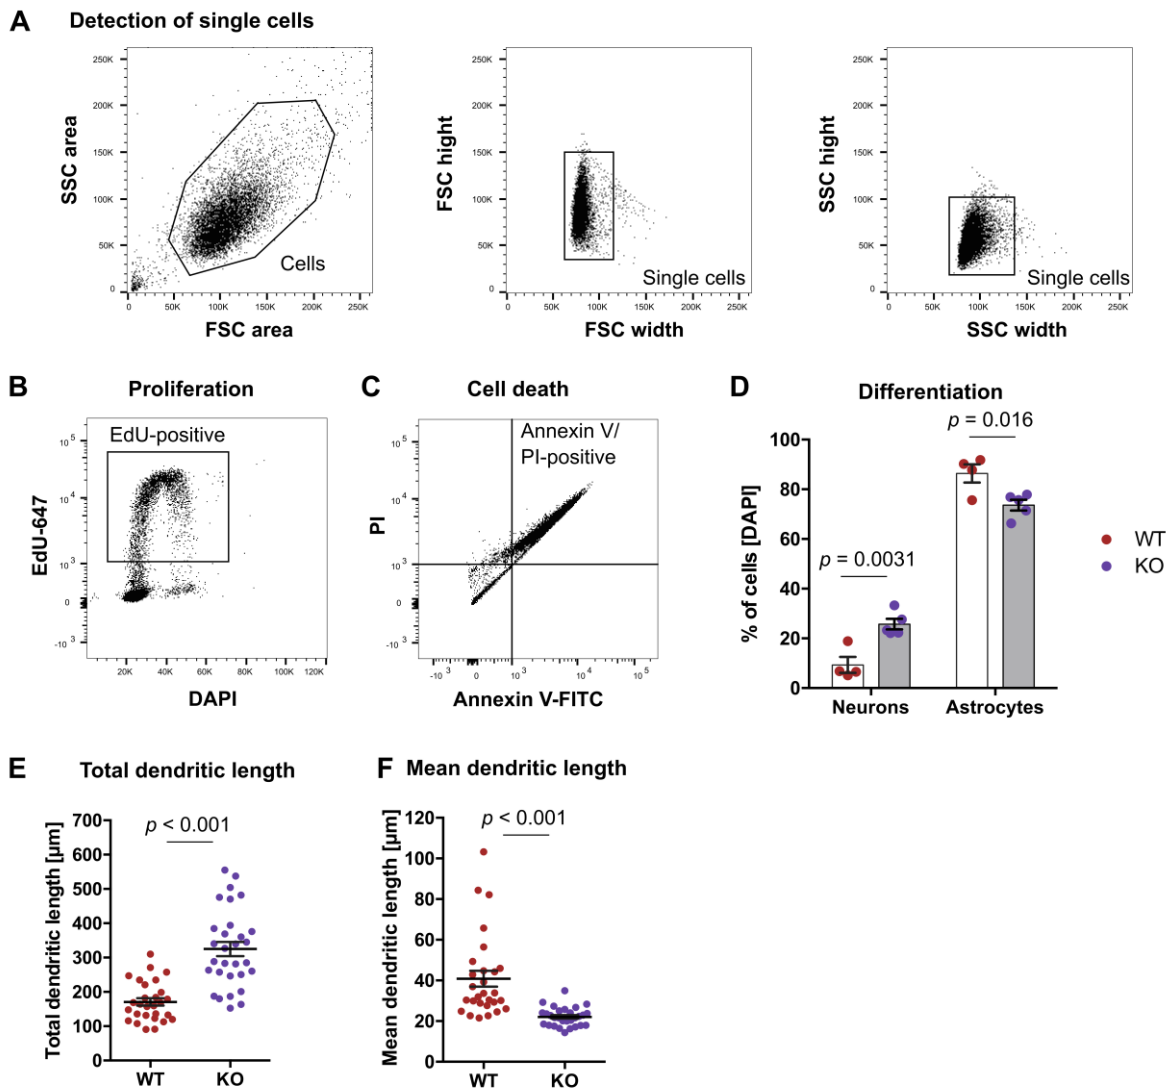

### Appendix Figure S2: Analysis of *in vitro* NPCs and differentiated neurons.

**A**, FACS strategy used for detection of neural precursor cells (NPCs). Single cells were identified by plotting forward scatter (FSC) and side scatter (SSC).

**B**, Cells in S-phase were identified based on EdU fluorescence intensity (corresponds to Fig. 2D).

**C**, Detection of dead cells by intensity of apoptosis marker Annexin V and incorporation of propidium iodide (PI; corresponds to Fig. 2E).

**D**, Differentiated *Dnmt3a/b*-KO cultures contained increased percentages of Tubb3-positive neurons and reduced percentages of GFAP-positive astrocytes compared to WT cultures. Depicted *p*-values from unpaired *t*-test.

**E-F**, Tubb3-positive neurons in differentiated KO cultures exhibited elevated total dendritic length but reduced mean dendritic length compared to WT cultures, suggesting that KO

neurons grew a larger number of shorter dendrites. Depicted  $p$ -values in E-F are from unpaired  $t$ -test.

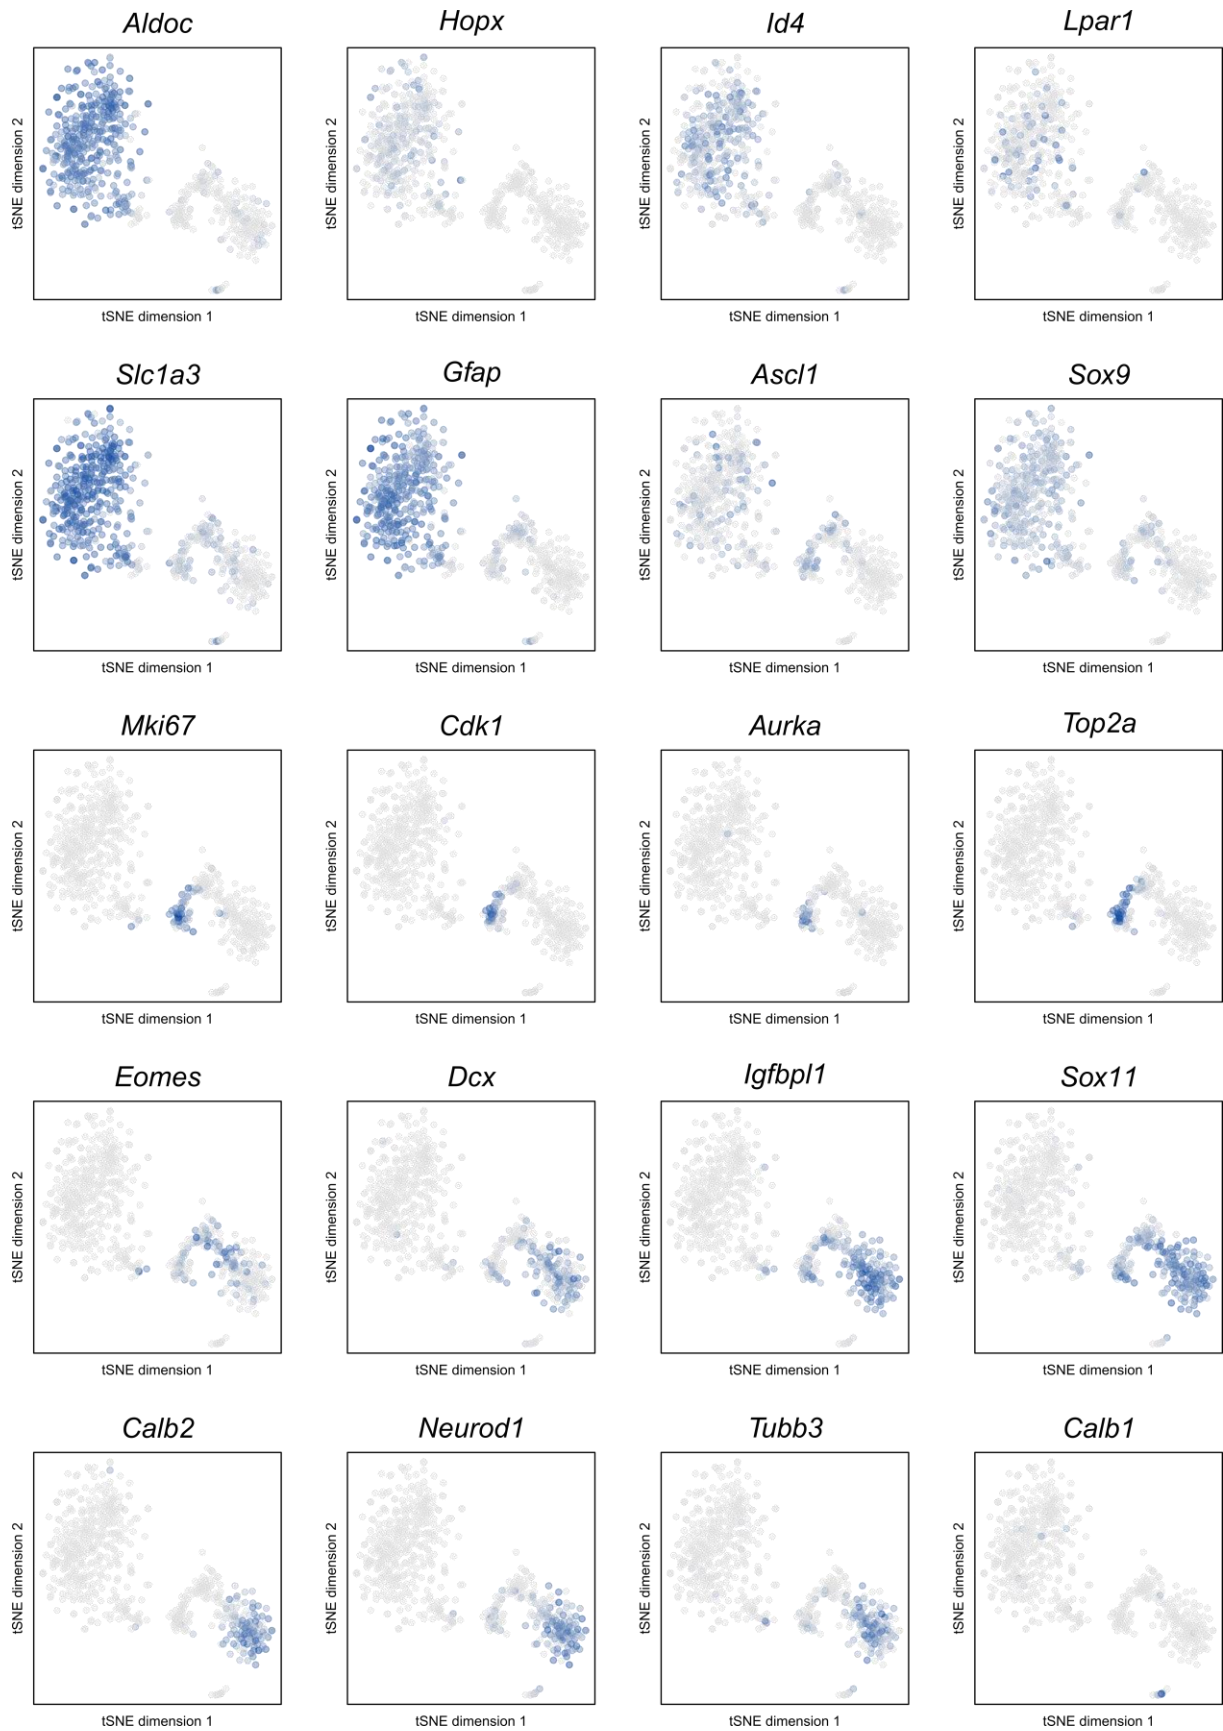

**Appendix Figure S3: Marker gene expression in cell clusters.** Depicted are t-SNE plots for marker genes that label specific cell stages during adult hippocampal neurogenesis.

Appendix Table S1: Sample information of the RRBS data

| Sample  | Sample description | Sequencing reads | Covered cytosines ( $\geq 10x$ ) | Covered CpGs ( $\geq 10x$ ) | Mean sequencing depth (coverage)/ CpG | Figures |
|---------|--------------------|------------------|----------------------------------|-----------------------------|---------------------------------------|---------|
| NPC1    | Dnmt3a/b WT        | 15236174         | 8371398                          | 998060                      | 15.55                                 | 1; EV2  |
| NPC1    | Dnmt3a/b WT        | 19677495         | 9224287                          | 1198780                     | 18.16                                 | 1; EV2  |
| NPC3    | Dnmt3a/b WT        | 16605749         | 8623578                          | 1059404                     | 16.61                                 | 1; EV2  |
| Neuron1 | Dnmt3a/b WT        | 13855307         | 7197657                          | 1190660                     | 21.36                                 | 1; 3    |
| Neuron2 | Dnmt3a/b WT        | 10412335         | 6189769                          | 918599                      | 16.78                                 | 1; 3    |
| Neuron3 | Dnmt3a/b WT        | 13934717         | 6807307                          | 1205035                     | 23.45                                 | 1; 3    |
| NPC4    | Dnmt3a/b KO        | 16274656         | 8800300                          | 1075483                     | 16.19                                 | EV2     |
| NPC5    | Dnmt3a/b KO        | 11724813         | 7182666                          | 767015                      | 13.72                                 | EV2     |
| NPC6    | Dnmt3a/b KO        | 10973854         | 6900260                          | 662652                      | 13.28                                 | EV2     |
| Neuron4 | Dnmt3a/b KO        | 13535640         | 7701026                          | 1001149                     | 17.36                                 | 3       |
| Neuron5 | Dnmt3a/b KO        | 15660040         | 8338379                          | 1176847                     | 18.95                                 | 3       |
| Neuron6 | Dnmt3a/b KO        | 15431985         | 8277766                          | 1146612                     | 18.42                                 | 3       |

Appendix Table S2: List of primer sequences.

| <b>Primer name with target gene</b> | <b>Primer sequence (5'-3')</b>                 | <b>Annealing temperature</b> | <b>Used for</b>    |
|-------------------------------------|------------------------------------------------|------------------------------|--------------------|
| Act_q_fw<br>Act_q_re                | ACCCGCGAGCACAGCTTC<br>ACATGCCGGAGCCGTTGTC      | 59 °C                        | qRT-PCR,<br>RT-PCR |
| Dnmt3a_q_fw<br>Dnmt3a_q_rev         | AGGTTTGATCCAAGCAGGTG<br>ACTTGACTGGTGCCGAGAGT   | 59 °C                        | RT-PCR             |
| Dnmt3b_q_fw<br>Dnmt3b_q_rev         | CATGTGGCTAGTCCTCACGA<br>GGGAATGGATTTCCTAAGC    | 59 °C                        | RT-PCR             |
| Dnmt3a_fw<br>Dnmt3a_rev             | CTACATTGCCTCCGAGGTGT<br>GGCCACCACATTCTCAAAGA   | 62°C                         | Genotyping         |
| Dnmt3b_fw<br>Dnmt3b_rev             | CGCAGGAAAGATTGGAACAT<br>GTGAGCAGCAGACACCTTGA   | 62°C                         | Genotyping         |
| Camta1_q_fw<br>Camta1_q_rev         | GCAGTACGATGAGCTGGCTG<br>AGCTGGCATTAGAAGACGGC   | 59 °C                        | qRT-PCR            |
| Mapt_q_fw<br>Mapt_q_rev             | CGCCAGGAGTTTGACACAATG<br>GTTCTCCGCTCCATCATCG   | 59 °C                        | qRT-PCR            |
| Kcna1_q_fw<br>Kcna1_q_rev           | GCCATTGTGTCCGGTCATGGT<br>TGTTGTTCGATGCGGTGGATG | 59 °C                        | qRT-PCR            |
| Tiam1_q_fw<br>Tiam1_q_rev           | CACTGTCTTTCCGAGGGTGC<br>TCGATCCCCTGTCCGCAA     | 59 °C                        | qRT-PCR            |

Appendix Table S3: List of primary antibodies.

| <b>Antibody target</b> | <b>Antibody description</b> | <b>Manufacturer</b> | <b>Catalog number</b> | <b>Dilution</b> |
|------------------------|-----------------------------|---------------------|-----------------------|-----------------|
| BrdU                   | Monoclonal rat              | AbD Serotec         | -                     | 1:500           |
| Calbindin (Calb1)      | Monoclonal mouse            | Swant               | 300                   | 1:500           |
| Calretinin (Calb2)     | Polyclonal goat             | Swant               | CG1                   | 1:500           |
| c-Fos                  | Polyclonal rabbit           | Synaptic Systems    | 226003                | 1:1000          |
| Dcx                    | Polyclonal goat             | Santa Cruz          | sc-8066               | 1:500           |
| GFAP                   | Polyclonal rabbit           | DakoCytomation      | Z0334                 | 1:1000          |
| Gfp                    | Chicken                     | Abcam               | ab13970               | 1:750           |
| Ki67                   | Polyclonal rat              | eBioscience         | 14-5698-82            | 1:750           |
| NeuN                   | Polyclonal rabbit           | Abcam               | 104225                | 1:250           |
| NeuN                   | Monoclonal mouse            | Chemicon            | MAB377                | 1:250           |
| Pv                     | Monoclonal mouse            | Swant               | Pv235                 | 1:1000          |
| S100b                  | Polyclonal rabbit           | Abcam               | ab52642               | 1:500           |
| Sox2                   | Polyclonal goat             | R&D                 | AF2018                | 1:500           |
| Tubb3a                 | Monoclonal mouse            | Promega             | G712A                 | 1:1000          |



Appendix Table S4: List of secondary antibodies.

| <b>Antibody</b>                         | <b>Manufacturer</b>    | <b>Catalog number</b> | <b>Dilution</b> | <b>Combined with</b>            |
|-----------------------------------------|------------------------|-----------------------|-----------------|---------------------------------|
| Alexa Fluor 488 Donkey Anti-Rat IgG     | Jackson ImmunoResearch | 712-545-153           | 1:1000          | Anti-BrdU                       |
| Biotin Donkey Anti-Rat IgG              | Jackson ImmunoResearch | 712-065-153           | 1:1000          | Anti-BrdU, Anti-Ki67            |
| Cy3 Donkey Anti-Goat IgG                | Jackson ImmunoResearch | 705-165-151           | 1:1000          | Anti-Dcx, Anti-Sox2, Anti-Calb2 |
| Cy3 Donkey Anti-Mouse IgG               | Polyclonal rabbit      | 715-165-151           | 1:2000          | Anti-Tubb3                      |
| Alexa Fluor 647 Donkey Anti-Mouse IgG   | Jackson ImmunoResearch | 715-605-151           | 1:1000          | Anti-NeuN, Anti-Calb1           |
| Alexa Fluor 488 Donkey Anti-Rabbit IgG  | Jackson ImmunoResearch | 711-545-152           | 1:2000          | Anti-GFAP                       |
| Cy3 Donkey Anti-Rabbit IgG              | Jackson ImmunoResearch | 711-165-152           | 1:1000          | Anti-c-Fos                      |
| Alexa Fluor 647 Donkey Anti-Rabbit IgG  | Jackson ImmunoResearch | 711-605-152           | 1:1000          | Anti-S100b, Anti-NeuN           |
| Alexa Fluor 488 Donkey Anti-Chicken IgY | Jackson ImmunoResearch | 703-545-155           | 1:1000          | Anti-Gfp                        |

Appendix Table S5: Statistics for cell quantifications

| Figure | Phenotype                                              | Number of replicates WT                                   | Number of replicates KO                                   | P-value from non-parametric test (Mann-Whitney) |
|--------|--------------------------------------------------------|-----------------------------------------------------------|-----------------------------------------------------------|-------------------------------------------------|
| 2D     | % EdU-positive cells                                   | 4 cultures from 4 mice                                    | 5 cultures from 5 mice                                    | 0.73                                            |
| 2E     | % Annexin V/PI-positive cells                          | 4 cultures from 4 mice                                    | 5 cultures from 5 mice                                    | 0.016                                           |
| 2F     | Gfap/DAPI-positive cells<br>Tubb3a/DAPI-positive cells | 4 cultures from 4 mice                                    | 5 cultures from 5 mice                                    | 0.016 (astrocytes);<br>0.016 (neurons)          |
| 2I     | Neuron morphology                                      | 29 neurons from 4 cultures (7-8 neurons/culture)          | 30 neurons from 5 cultures (6 neurons/culture)            | -                                               |
| 2K     | Astrocyte morphology                                   | 159 astrocytes from 4 cultures (25-60 astrocytes/culture) | 269 astrocytes from 5 cultures (45-60 astrocytes/culture) | 0.016                                           |
| 4A     | Ki67-positive cells                                    | 5 mice                                                    | 8 mice                                                    | 0.62                                            |
| 4C     | BrdU/NeuN-positive cells                               | 4 mice                                                    | 4 mice                                                    | 0.69                                            |
| 5A     | % Gfp/Dcx/Calb1-positive cells                         | 3 mice                                                    | 3 mice                                                    | 0.40 (immature);<br>0.10 (mature)               |
| 5C     | % Calb2/Dcx-positive cells                             | 3 mice                                                    | 3 mice                                                    | 0.057                                           |
| 5D     | BrdU-positive cells                                    | 10 mice                                                   | 10 mice                                                   | 0.81                                            |
| 5E     | % BrdU/Dcx/Calb-positive cells                         | 8 mice                                                    | 6 mice                                                    | 0.087 (immature);<br>0.0080 (mature)            |
| 5G     | Neuron morphology                                      | 20 neurons from 3 mice                                    | 23 neurons from 4 mice                                    | -                                               |
| 5I     | Spine numbers                                          | 32 neurons from 3 mice (10-12 neurons per mouse)          | 46 neurons from 4 mice (11-13 neurons per mouse)          | < 0.0001                                        |
| 5J     | Spine sizes                                            | 150 spines from 3 mice (50 spines per mouse)              | 200 spines from 4 mice (50 spines per mouse)              | 0.057                                           |
| 5K     | % Mushroom spines                                      | 150 spines from 3 mice (50 spines per mouse)              | 200 spines from 4 mice (50 spines per mouse)              | 0.057                                           |
| 6A     | BrdU-positive cells                                    | 4 STD; 6 ENR                                              | 3 STD; 3 ENR                                              | -                                               |
| 6B     | BrdU-positive cells                                    | 7 STD; 7 ENR                                              | 13 STD; 12 ENR                                            | -                                               |
| 6E     | c-Fos in DG after ENR                                  | 5 mice                                                    | 5 mice                                                    | 0.0079                                          |
| 6F     | c-Fos (infrapyramidal)                                 | 5 mice                                                    | 5 mice                                                    | 0.84                                            |
| 6F     | c-Fos (suprpyramidal)                                  | 5 mice                                                    | 5 mice                                                    | 0.0079                                          |
| 6      | % Brdu/NeuN/c-Fos-positive cells                       | 5 mice                                                    | 5 mice                                                    | 0.83                                            |
| 6      | % c-Fos/Dcx-positive cells                             | 5 mice                                                    | 4 mice                                                    | 0.56                                            |
| 6      | c-Fos in CA3 after ENR                                 | 4 mice                                                    | 5 mice                                                    | 0.032                                           |
| 6      | % c-Fos/Pv-positive cells                              | 4 mice                                                    | 4 mice                                                    | 0.057                                           |
| 7C     | Path length                                            | 13 mice                                                   | 23 mice                                                   | 0.014 (day 4)<br>< 0.0001 (day 5)               |
| 7D     | Latency                                                | 13 mice                                                   | 23 mice                                                   | 0.0074 (day 4)<br>0.0012 (day 5)                |
| 7E     | % Time in old goal position                            | 13 mice                                                   | 23 mice                                                   | < 0.0001                                        |
| EV3B   | % Gfp/Sox2/S100b-positive cells                        | 3                                                         | 4                                                         | 0.63 (NSPCs); 0.23 (astrocytes)                 |
| EV3E   | Sox2-positive cells                                    | 13 mice                                                   | 15 mice                                                   | 0.59                                            |
| EV3G   | Ki67-positive cells                                    | 7 mice                                                    | 7 mice                                                    | 0.80                                            |
